# Supplementary material for: Electrospun zein-based conductive composites engineered with versatile nanomaterials for high-performance supercapacitors
Source: Royal Society of Chemistry journal article supplement (doi:10.1039/d5ta02307f), 2025-01-01
Supplement: d5ta02307f1.pdf [file d5ta02307f1.pdf]

## Electronic Supplementary Information

### Electrospun Bio-Zein Conductive Composites Engineered with Versatile Nanomaterials for High-Performance Supercapacitors

Young-Hwi Jo<sup>a</sup>, Jonghyun Choi<sup>b</sup>, Yen Bach Truong<sup>c</sup> and Jin-Heong Yim<sup>\*a</sup>

*<sup>a</sup>Division of Advanced Materials Engineering, Kongju National University, Budaedong 275, Seobuk-gu, Cheonan-si, Chungnam 31080, South Korea*

*<sup>b</sup>The New Zealand Institute of Plant and Food Research, Bisley Road, Ruakura Research Centre, Hamilton 3214, New Zealand*

*<sup>c</sup>CSIRO, Manufacturing Research Unit, Research Way, Clayton Victoria, 3168, Australia*

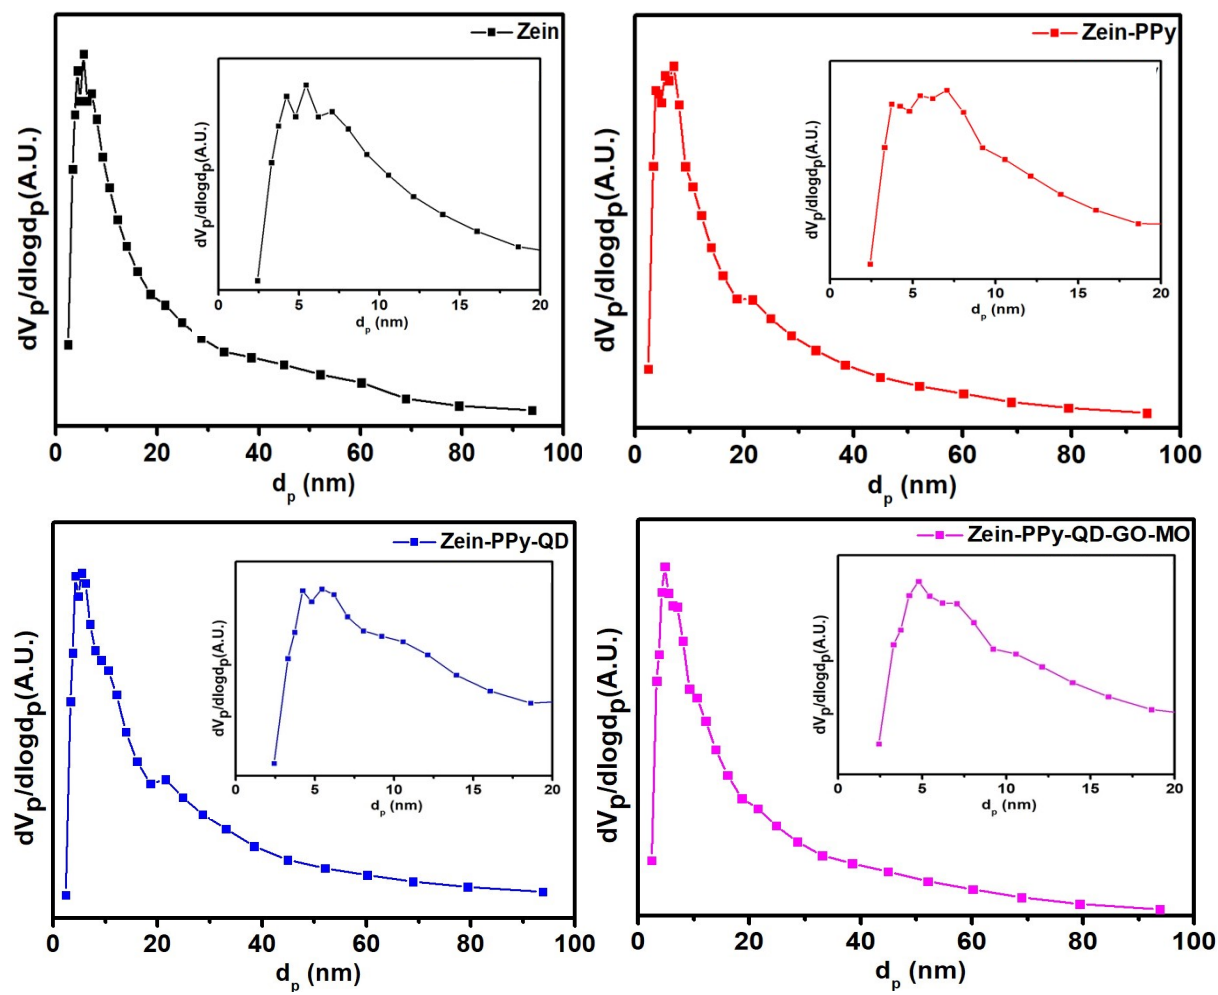

**Fig. S1:** N<sub>2</sub> adsorption–desorption isotherms and corresponding pore size distributions of the zein-based composites.

**Table. S1:** BET surface areas and average pore diameters for each functionalization stage.

| <b>Sample</b>         | <b><math>S_{\text{BET}}</math><br/>(m<sup>2</sup>/g)</b> | <b><math>V_{\text{total}}</math><br/>(cm<sup>3</sup>/g)</b> | <b><math>V_{\text{meso}}</math><br/>(cm<sup>3</sup>/g)</b> | <b><math>V_{\text{micro}}</math><br/>(cm<sup>3</sup>/g)</b> | <b>Pore<br/>size<br/>(nm)</b> |
|-----------------------|----------------------------------------------------------|-------------------------------------------------------------|------------------------------------------------------------|-------------------------------------------------------------|-------------------------------|
| Zein                  | 2.83000                                                  | 0.01700                                                     | 0.00719                                                    | 0.00981                                                     | 5.43                          |
| Zein-PPy              | 0.30693                                                  | 0.01001                                                     | 0.00475                                                    | 0.00535                                                     | 7.05                          |
| Zein-PPy-<br>QD       | 0.00396                                                  | 0.00433                                                     | 0.00214                                                    | 0.00219                                                     | 5.43                          |
| Zein-PPy-<br>QD-GO-MO | 0.63264                                                  | 0.00528                                                     | 0.00248                                                    | 0.00280                                                     | 4.78                          |

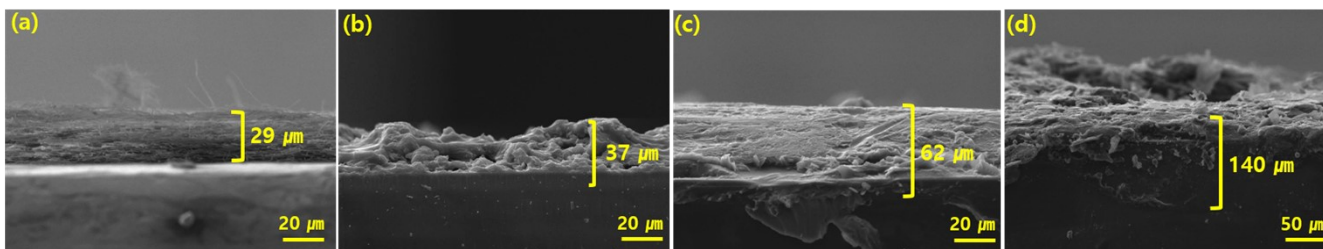

**Fig. S2:** Cross-sectional SEM images of electrospun electrodes: pristine zein (a), zein-PPy (b), zein-PPy-QD (c), all at 1 000 $\times$  magnification, and zein-PPy-QD-GO-MO (d) at 500 $\times$  magnification.

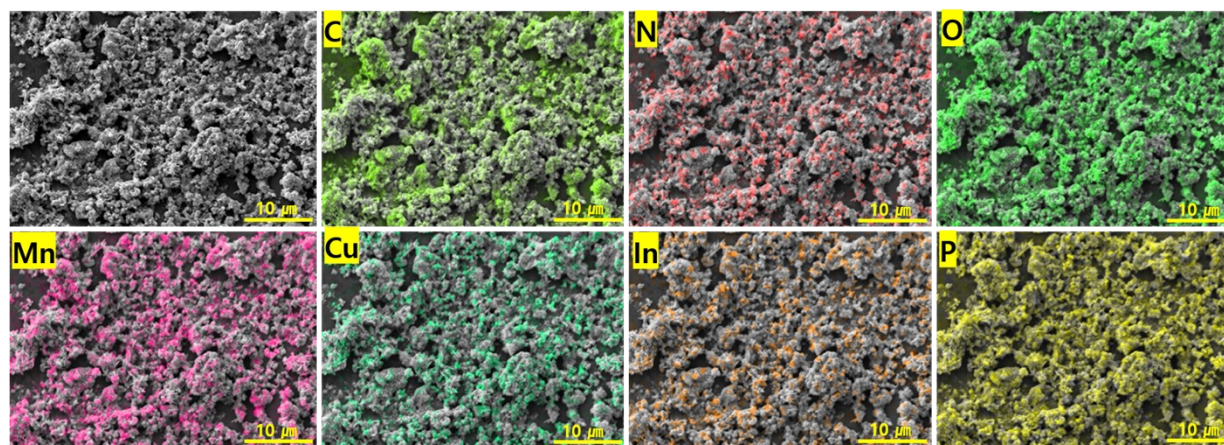

**Fig. S3:** EDS mapping of the analysis zein-PPy-QD-GO-MO composite.

**Table. S2:** Sheet resistance, layer thickness, and conductivity of zein-based composites

|                   | Sheet resistance<br>( $\Omega/\square$ ) | Thickness of the<br>layer ( $\mu\text{m}$ ) | Conductivity<br>(S/cm) |
|-------------------|------------------------------------------|---------------------------------------------|------------------------|
| Zein-PPy          | $1.5 \times 10^7$                        | 37                                          | $1.80 \times 10^{-5}$  |
| Zein-PPy-QD       | $2.9 \times 10^6$                        | 62                                          | $5.56 \times 10^{-5}$  |
| Zein-PPy-QD-GO-MO | $4.9 \times 10^5$                        | 140                                         | $1.44 \times 10^{-4}$  |

$$\sigma = \frac{1}{R_s t} \quad \text{..... (Eq. S1)}$$

**Eq. S1:** Equation of conductivity calculation:

where  $\sigma$  is the electrical conductivity ( $\text{S cm}^{-1}$ ),  $R_s$  is the sheet resistance ( $\Omega \square^{-1}$ ), and  $t$  is the thickness of the layer (cm).

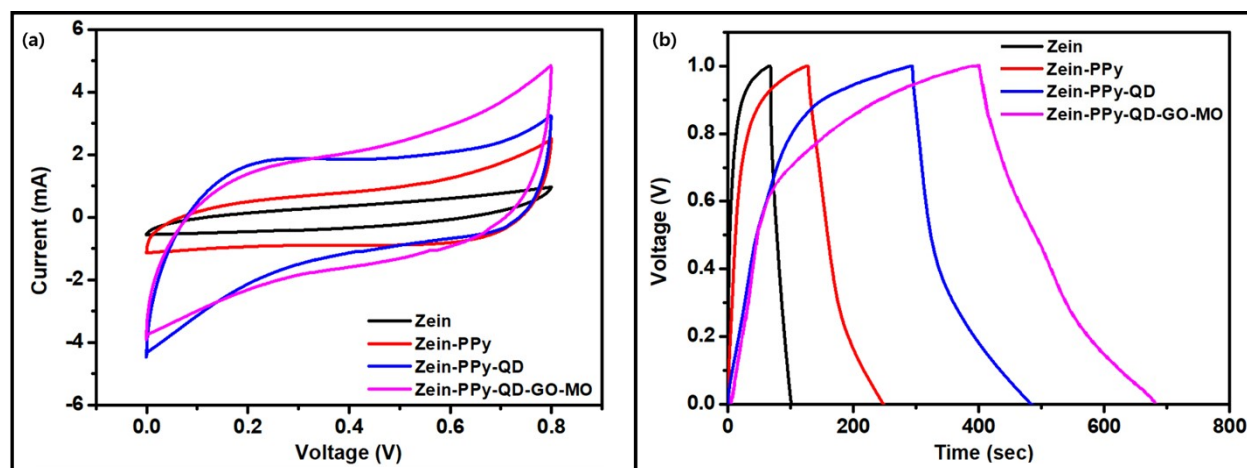

**Fig. S4:** CV (a) and GCD (b) of electrospun zein-based material composites at 250 mV/s and 0.25 mA scan rate.



**Table. S3:** Electrochemical performance comparison of our electrospun zein-based composite and representative bio-derived nanofiber scaffolds

| Scaffold (Matrix)                              | Active Materials                      | Electrolyte                           | Current density          | Capacitance                 | Cycle number | Capacitance Retention | coulombic efficiency | Energy density                | Power density                 | Ref no.  |
|------------------------------------------------|---------------------------------------|---------------------------------------|--------------------------|-----------------------------|--------------|-----------------------|----------------------|-------------------------------|-------------------------------|----------|
| Electrospun Zein                               | PPy, InP QD, GO, CuO/MnO <sub>2</sub> | 6.0 M KOH                             | 0.25 mA cm <sup>-2</sup> | 135.00 mF cm <sup>-2</sup>  | 6,000        | 70.0%                 | Approximately 100.0% | 18.75 μWh cm <sup>-2</sup>    | 20,000.00 mW cm <sup>-2</sup> | Our work |
| Glucose/Type A gelatin                         | PPy                                   | 0.2 M LITFSI                          | 0.05 mA                  | 175.00 F g <sup>-1</sup>    |              | not described         | not described        | 1519.10 μWh g <sup>-1</sup>   | 0.34 mW g <sup>-1</sup>       | 73       |
| cellulose film                                 | PPy, f-CNT                            | 1.0 M H <sub>2</sub> SO <sub>4</sub>  | 1.00 mA cm <sup>-2</sup> | 2147.00 mF cm <sup>-2</sup> | 10,000       | 104.6                 | not described        | 190.80 μWh cm <sup>-2</sup>   | 0.43 mW cm <sup>-2</sup>      | 74       |
| cellulose tissue                               | Graphene                              | 1.0 M H <sub>2</sub> SO <sub>4</sub>  | 0.50 A cm <sup>-2</sup>  | 80.00 mF cm <sup>-2</sup>   | 5,000        | 95.0%                 | 99.1%                | 9.00 μWh cm <sup>-2</sup>     | 100.00 mW cm <sup>-2</sup>    | 75       |
| cellulose nanofiber ink                        | GO                                    | 1.0 M KOH                             | 1.00 mA cm <sup>-2</sup> | 98.61 mF cm <sup>-2</sup>   |              | not described         | not described        | 8.59 μWh cm <sup>-2</sup>     | 0.41 mW cm <sup>-2</sup>      | 76       |
| Cellulose Film                                 | CNT,MnO <sub>2</sub>                  | 1.0 M Na <sub>2</sub> SO <sub>4</sub> | 1.00 mA cm <sup>-2</sup> | 7956.00 mF cm <sup>-2</sup> | 10,000       | 79.0%                 | not described        | 251.66 μW h cm <sup>-2</sup>  | 24.85 mW cm <sup>-2</sup>     | 77       |
| cellulose nanofiber                            | GO,PPy                                | 1.0 M H <sub>2</sub> SO <sub>4</sub>  | 0.10 mA cm <sup>-2</sup> | 647.00 mF cm <sup>-2</sup>  | 10,000       | 92.5%                 | 92.6%                | 14.37 μWh cm <sup>-2</sup>    | 0.02 mW cm <sup>-2</sup>      | 78       |
| Lignin containing cellulose nanofibrill        | PPy                                   | PVA-H <sub>2</sub> SO <sub>4</sub>    | 1.00 mA cm <sup>-2</sup> | 2567.00 mF cm <sup>-2</sup> | 2,000        | 75.1%                 | 98.0%                | 88.60 μWh cm <sup>-2</sup>    | 0.50 mW cm <sup>-2</sup>      | 79       |
| Lignin-based hydrogel                          | PPy, GO, ZnO                          | Py/NaClO <sub>4</sub>                 | 1.00 A g <sup>-1</sup>   | 175.00 F g <sup>-1</sup>    | 1,000        | 72.3%                 | not described        | 11,909.70 μWh g <sup>-1</sup> | 0.80 mW g <sup>-1</sup>       | 80       |
| electrospun lignin based carbon/graphene fiber | lignin-derived carbon/graphene        | PVA/H <sub>2</sub> SO <sub>4</sub>    | 0.10 mA cm <sup>-2</sup> | 206.48 mF cm <sup>-2</sup>  | 7,000        | 98.0%                 | not described        | 5.79 μW h cm <sup>-2</sup>    | 20.02 mW cm <sup>-2</sup>     | 81       |
| chitosan                                       | GO/PPy                                | PVA/H <sub>2</sub> SO <sub>4</sub>    | 1.00 mA cm <sup>-2</sup> | 72.79 mF cm <sup>-2</sup>   | 10,000       | 88.0%                 | not described        | 6.50 μWhcm <sup>-2</sup>      | 1.33 mW cm <sup>-2</sup>      | 82       |
| chitosan                                       | GO,MnO <sub>2</sub>                   | 1.0 M Na <sub>2</sub> SO <sub>4</sub> | 5.00 mA cm <sup>-2</sup> | 3553.74 mF cm <sup>-2</sup> | 10,000       | 74.1%                 | 99.1%                | 0.59 mWh cm <sup>-2</sup>     | 3000.00 mW cm <sup>-2</sup>   | 83       |
